# Supplementary material for: Evolution of the Selenoproteome in Helicobacter pylori and Epsilonproteobacteria
Source: PubMed Central journal article supplement (PMC4607533; doi:10.1093/gbe/evv177), 2015-09-04
Supplement: supp_evv177_Figures_Tables_supplementary_SelA.pdf [file supp_evv177_Figures_Tables_supplementary_SelA.pdf]

## **Evolution of the selenoproteome in *Helicobacter pylori* and Epsilonproteobacteria**

Cravedi, P., Mori, G., Fischer, F., Percudani, R.

### **Supplementary figures and tables**

Figure S1. Evidence for a 7/5 secondary structure in  $\epsilon$ -proteobacteria tRNA<sup>Sec</sup>

Figure S2. Structural alignment of representative  $\epsilon$ -proteobacteria tRNA<sup>Sec</sup>

Figure S3. Secondary structures of tRNA<sup>Sec</sup> identified in  $\epsilon$ -proteobacteria

Figure S4. Evidence for a selenocysteine thiol peroxidase (Prx) in *C. curvus*

Figure S5. Comparison of *C. curvus* thiol peroxidase with homologous selenoproteins

Figure S6. Predicted RNA secondary structures around Sec-encoding codons of  $\epsilon$ -proteobacteria

Figure S7. Redefinition of coding sequence boundaries in SelA sequences

Figure S8. dN/dS ratios in the SelA coding sequences of *H. pylori* and *H. acinonychis*

Figure S9. Comparison of the organism tree and the SelA tree in  $\epsilon$ -proteobacteria

Figure S10. Comparison of different models of dN/dS variation of the *selA* gene along branches

Figure S11. Evidence for a closed frame and presence of a coding ORF upstream of *H. pylori* SelA

Figure S12. Genetic neighborhood of the *selA* gene in Helicobacteriaceae

Table S1. Genes involved in the Sec-decoding trait and selenometabolism identified in Epsilonproteobacteria

Table S2. Sec-encoding proteins identified in Epsilonproteobacteria genomes

Table S3. Position of Sec-encoding codons and equivalent Cys-encoding codons in  $\epsilon$ -proteobacteria genomes

Table S4. Conservation of SelA residues involved in hydrogen-bonded intra-dimer interactions

Table S5. Conservation of SelA residues involved in hydrogen-bonded dimer-dimer interactions

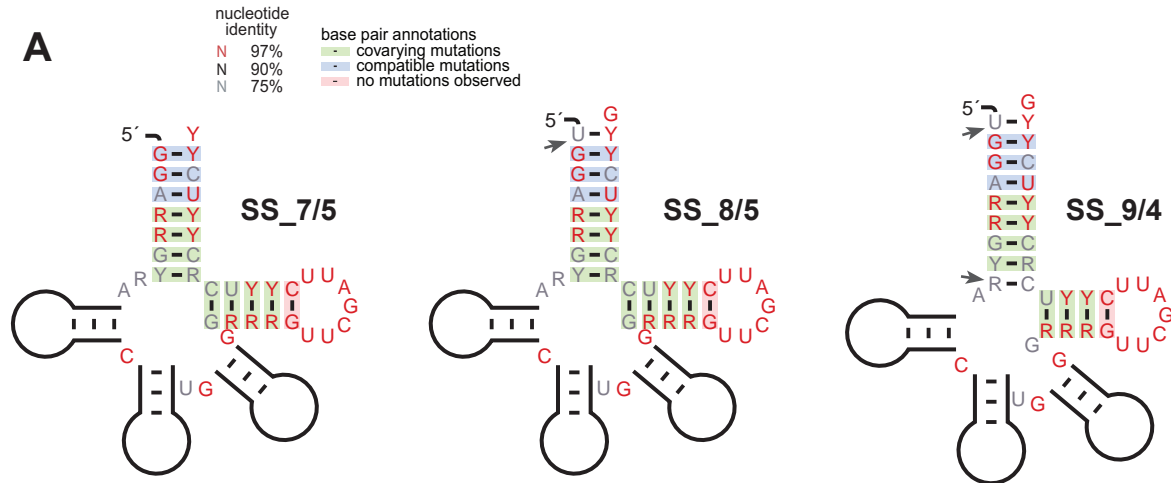

**B**

|                             | SS_7/5       | SS_8/5       | SS_9/4 |
|-----------------------------|--------------|--------------|--------|
| NC_017761.1:683686-683781   | <b>27.58</b> | 26.94        | 25.67  |
| NC_014935.1:1763108-1763204 | <b>27.43</b> | 26.94        | 25.49  |
| NC_012115.1:1239494-1239590 | <b>35.37</b> | 34.82        | 33.22  |
| NC_008599.1:335720-335815   | <b>35.85</b> | 35.36        | 33.92  |
| NC_009802.1:1788312-1788407 | <b>27.29</b> | 26.13        | 24.92  |
| NC_002163.1:1432373-1432468 | <b>29.22</b> | 28.74        | 27.63  |
| NC_013949.1:727834-727929   | 26.80        | <b>27.76</b> | 26.93  |
| NC_004917.1:419603-419698   | 33.91        | <b>34.48</b> | 32.98  |
| NC_009714.1:280399-280494   | <b>28.05</b> | 27.57        | 26.60  |
| NC_012039.1:343444-343539   | <b>19.75</b> | 19.28        | 18.32  |
| NC_017735.1:1339955-1340050 | <b>29.70</b> | 29.21        | 28.50  |
| NC_013512.1:2018206-2018302 | <b>21.97</b> | 20.81        | 19.53  |
| NC_014166.1:977634-977731   | <b>24.27</b> | 23.78        | 22.36  |
| NC_018002.1:2149993-2150089 | <b>21.97</b> | 20.81        | 19.53  |
| NC_017737.1:723764-723859   | <b>29.70</b> | 29.21        | 28.50  |
| NC_009850.1:1529457-1529553 | <b>24.96</b> | 24.47        | 22.87  |
| NC_015674.1:696633-696729   | <b>32.52</b> | 31.88        | 30.40  |
| NC_009715.1:1748632-1748727 | <b>30.98</b> | 29.82        | 28.62  |
| NC_014810.2:420555-420651   | 33.16        | <b>33.73</b> | 32.48  |
| NC_007575.1:862218-862314   | <b>22.37</b> | 21.88        | 20.24  |
| NC_005090.1:797104-797199   | <b>22.00</b> | 21.52        | 20.78  |

Figure S1. **Evidence for a 7/5 secondary structure in  $\epsilon$ -proteobacteria tRNA<sup>Sec</sup>.** (A) Consensus secondary structures of  $\epsilon$ -proteobacteria tRNA<sup>Sec</sup> showing lack of covariance support for bp. num. 1 in the 8/5 model and for bp. num. 1 and num. 9 in the 9/4 model (arrows). (B) Secondary structure (SS) components of the bit scores obtained for 21  $\epsilon$ -roteobacteria tRNA<sup>Sec</sup> with three different covariance models using the Cmsearch program (Nawrocki and Eddy 2013). Best scores for each tRNAs are shown in bold. The three covariance models were based on artificial sequences generated by the Cmemit program from an initial tRNA<sup>Sec</sup> model. Each models had the same HMM component, as obtained by building a model without SS information (cmbuild --ignorant), and different SS components, as obtained by building complete models of alignments comprising 7/5, 8/5, and 9/4 base pairs in the aminoacyl and T stems. The SS components of Cmsearch scores were calculated by subtracting the HMM score to the scores obtained with the complete models.

```

# STOCKHOLM 1.0
#=GF AU      Infernal 1.0.2

lcl|NC_012115.1:1239495-1239589      GGAGGGGAUGUGaU.CC.UGGUGGACACCCCGGGCUCAAACCCGGU.GGGGCGGAGGUGACUGUCUGCccGGAAGGUUCGAUUCUCCCCUUC
lcl|NC_002163.1:1432374-1432467      GGAAGAUUAGCGuA.UC.UGGUGAUCGCCACUGACUCAAUAUCAGAU.GAAAGGAUAGUU.GACUAUUUUUGGGAGUUUCGAUUCUCUCAUCUUCUC
lcl|NC_004917.1:419604-419697      GGAGAGCAAACGuC.UC.UGGUGGCGGUCUUGGGCUCAAACCCAAU.GAAGGAUUAGGU.GUCUAAUUCUUGGGAGUUUCGAUUCUCUCUCUCUCUC
lcl|NC_009714.1:280400-280493      GGAGAGUAAGUC.G.UGcCGGUGGCGAUCGCGGACUCAAUCCGAU.GAAAGGGCGGUU.GACCGUUCUUUGGGGGUUCGAUUCUCCUCACUCUCUC
lcl|NC_009850.1:1529458-1529552      GGGAGGUUAGUG.UaCC.UGGUGGGCACCACAGGCUCAAACCCUGAUuGACGGUUUUUGAU.GACAACGCCUGGGAGGUUCGAUUCUCCACCUUCUC
lcl|NC_012039.1:343445-343538      GGAAGGUUAGCUuA.UC.UGGUGAUGGCCACUGACUCAAUAUCAGAU.GAAAGGGUAGUU.GACUACUUUUUGGGAGUUUCGAUUCUCUCAUCUUCUC
lcl|NC_014166.1:977635-977730      GGGAGAUUAGUG.UaCC.UGGUGGGCACACAGGCUCAAACCCUGAUuGACGGUUUAUGUGuAAUACGCCUGGGAGGUUCGAUUCUCCUCAUCUUCUC
lcl|NC_014810.2:420556-420650      GGAGAGCAGCA.UgGC.UGGUGCGGCCUUGGGCUCAAACCCAAA.GAGCGUUUAGGUuUCCUAAAGCGUUGCAAAGUUCGAUUCUUUGGCUUCUU
lcl|NC_017735.1:1339956-1340049      GGAGAGUAAGCG.U.AUcUGGUGUAUGCCUUGGGCUCAAACCCAAU.GAGUGCCUAGAU.GUCUAGGUGUCGGAAGUUCGAUUCUUCACUCUCUC
lcl|NC_017761.1:683687-683780      GGAGGGCAAGCG.U.CUcUGGUGGGCGUGGCGGCUCAAACCCAAU.GAAGGGUUAGGU.GUCUAAUUCUUGGGAGUUUCGAUUCUCUCGCCUUCU
#=GC SS_cons      ((((((, <<<. <<<. >>>>>>, <<<<<>>>>, ., <<<<<<<<, , , >>>>>>>>, <<<<<>>>>))))):
#=GC RF      [accep]====.=. [=Dloop]======acd=====[=====vlp=====]=====[Tloop]====[accep]=
#=GC R2R_LABEL      .....j.....1.....2.....3

#=GF R2R set_dir pos0 90 f
#=GF R2R place_explicit 3 3-- 0 1 0 0 0

#=GF R2R multistem_junction_bulgey j disable_auto_flip_place_explicit J0/base 0 1.62706 2.29987 0 0 -270 J1/base 0 4.83116
1.01097 0 0 0 J2/base 0 5 -3 0 0 -50 J3/base 0 2.32414 -2.52817 0 0 -90

#=GF R2R ifdef skeleton
#=GF R2R SetDrawingParam scaleMeasurementsBy 0.25
#=GF R2R SetDrawingParam backboneWidth 1.5pt
#=GF R2R SetDrawingParam pairBondWidth 0.5pt
#=GF R2R endif

#=GF Makefile skeleton-with-pairbonds
//

```

Figure S2. **Structural alignment of representative  $\epsilon$ -proteobacteria tRNA<sup>Sec</sup>.** The proposed base pairing is represented below the alignment in Stockholm notation. The structural model assumes 6 base pairs in the D arm (with possible single-base bulges) and 7 base pairs in the aminoacyl arm (without bulges). The R2R instructions used to draw tRNAs in cloverleaf structures (see figs. 1, S1, and S3) are reported below the alignment.

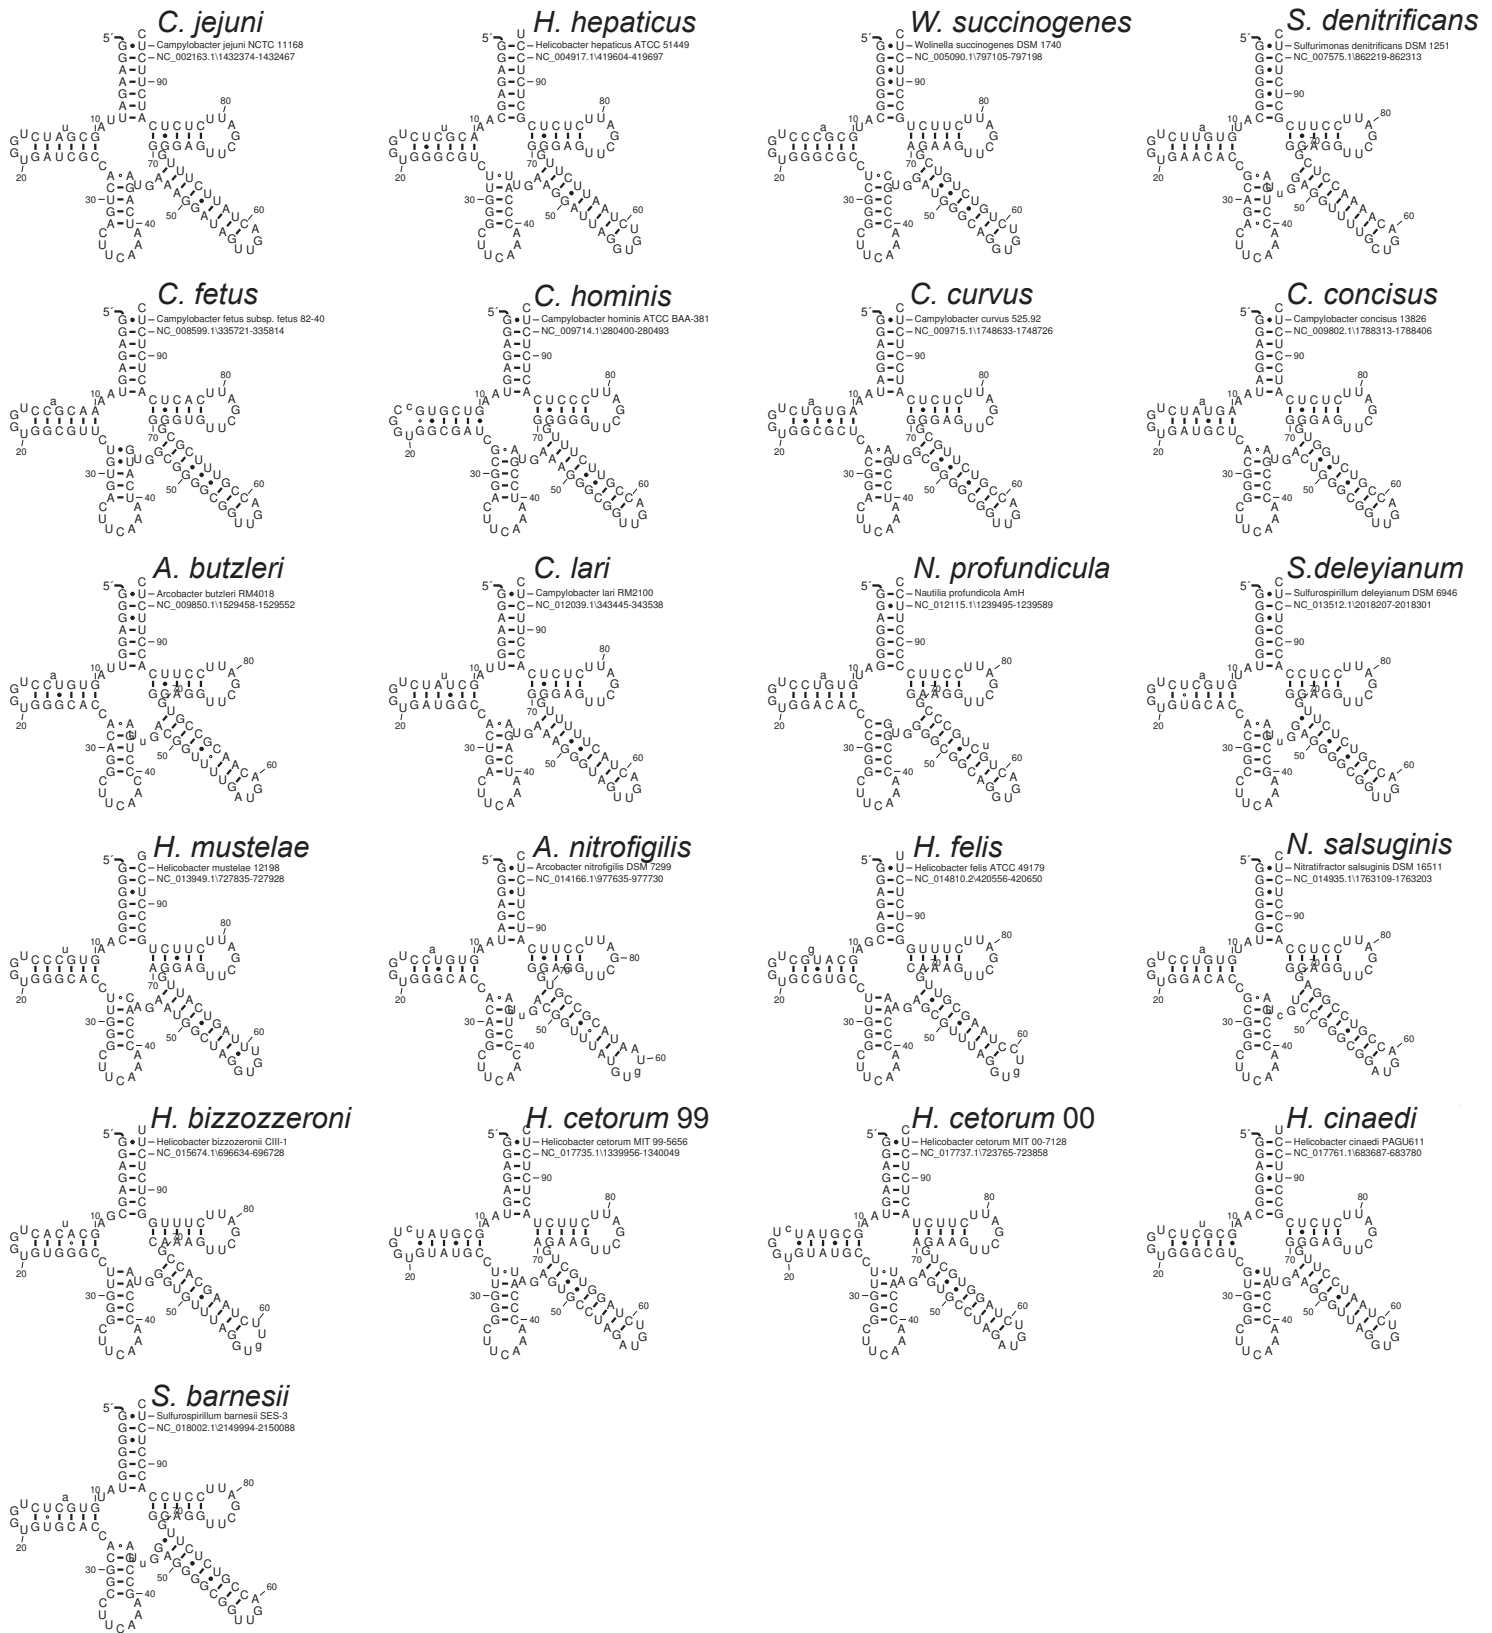

Figure S3. Secondary structures of tRNA<sup>Sec</sup> identified in  $\epsilon$ -proteobacteria. Structures were drawn in the standard tRNA layout using the R2R program based on the structural alignment in Stockholm format obtained with the Calign program of the Infernal package (Nawrocki & Eddy 2013).

**A**

```
NC_009715:1801466-1801996 ...GVITYKEIVAEIADDEPDYEALKAINEAAST-CCGSUH(stop) 177
YP_001489493.1 ...GKIVYKQIVPEITAEPDYEAVLEAAKGATSTSCCGSCH(stop) 179
YP_003654965.1 ...GIVRYKEICEDISDEPNYEALNAVKEVTETSCCGTCH(stop) 174
* ** * * ** ** * * * ** *
```

**B**

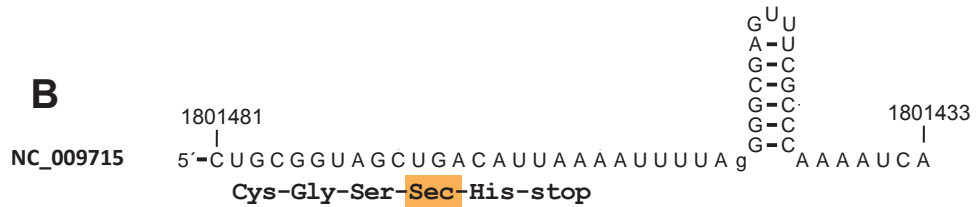

Figure S4. Evidence for a selenocysteine thiol peroxidase (Prx) in *C. curvus*. (A) The C-terminal region of a TGA-containing open reading frame of *Campylobacter curvus* (NC\_009715:1801466-1801996) is aligned with homologous proteins of *Arcobacter butzleri* (YP\_001489493.1) and *Arcobacter nitrofigilis* (YP\_003654965.1); the putative selenocysteine (U) residue is shaded in orange. (B) The secondary structure of the SECIS element of *C. curvus* Prx as predicted by the bSECISsearch program (Zhang and Gladyshev 2005); the protein translation is shown below the RNA sequence.

```

                                1           10           20
PeroxioredoxinYP_593855.1      .....MP.....LKVLEKAPDFTVKAVIR.....ERQITFKLSD
PeroxioredoxinYP_001378386.1  .....MAAKPKPVWRLEVGDEAPDFELMATGNTAGKGDARRKIRLSD
PeroxioredoxinZP_01667482.1  .....MAQLSD
PeroxioredoxinElIin6076      MRALAFRSLVFGAVLAAGLYAQPQQPPKTHLKEGDMAPDFTLTATTG.....GKVKLSD
Prx-likeZP_01906016.1       SSPGMSQPAPGFEFLALSEVRYGHYAKAPEAPAQQQRAPDFELTAHTG.....ETQKLSD
NC_009715.1_1801466_1801996  .....MATTKFKGSVVNLGTNSVSVGEKAPIVKVVGKDLS.....DIQIGG

                                30           40           50           60           70           80
PeroxioredoxinYP_593855.1      YLQKQHVVLAFFPLDWTVPVUQAQMPAYQVELDKFGAYDA...QVVGGISIDTIYSHMAWQQ..
PeroxioredoxinYP_001378386.1  YRGGKNVVLAFFPAAYTPVUTVQMPSYEEDLSEFERRNA...QVLGISTDQVHTNEAWA...
PeroxioredoxinZP_01667482.1  YQG.KWLVLFYPLDFTFVPTETIRGFNTRLGFEFRRINA...EILGVSTDSVFSHRAWIKTP
PeroxioredoxinElIin6076      FRGKSNVVLAFFPAAFGGTKEVTAYQAGMSKFDASES...KVFGISDNTFSQKEFAA...
Prx-likeZP_01906016.1       ALAEGFVVLMMFYRGFW...UPACNAQLGELHDNIEAFQSRGARVLLALSDPPQTSAQWAK..
NC_009715.1_1801466_1801996  EQGVVQIVVAVPSLD.TDVC..AMEAKKFNVKAASIQNA...QLILISMDLPFAMGRFCQ..

                                90           100          110          120          130          140
PeroxioredoxinYP_593855.1      ...KETGWMDDYPLASDFYPHGAVAQLYGVFREKPPPIPGINERATFVIDKEGITRFSKVYDLG
PeroxioredoxinYP_001378386.1  ...KSMGGLSFLSDHWHPHGYVAAALYGVLRGES...GICERATFVVDKQGRITAYVDIHDIA
PeroxioredoxinZP_01667482.1  VDDGGLGPIDYPLGSDIT..REVSRAYGVLLEDK...GIAQRGLFIIDPDGITQYFVVTNLD
PeroxioredoxinElIin6076      ...KNNLQFPLSDFAK.REVSAAYGVLMPEEN...GMANRSTFVIDKEKITVYIEQGNTA
Prx-likeZP_01906016.1       ...KKGFTDFTLSDPK..MQVIDAWGLRNVE..PELALHAYVIDPDGITRYRRIARRR
NC_009715.1_1801466_1801996  ...AEGIENVKVASDFR.AKEFAKAYCVLIEDGVLTGLTARAVFVIDASGVITVYKEIVAEI

                                150          160
PeroxioredoxinYP_593855.1      QQPPNEEVFEVLEKLNAPQS.....
PeroxioredoxinYP_001378386.1  EQPPTDKIMAAALDKLK.....
PeroxioredoxinZP_01667482.1  VGRSVEETLRVLQALQTRGLCPDWDKPKDKLL.....
PeroxioredoxinElIin6076      IDPTGADTACSRAAHKK.....
Prx-likeZP_01906016.1       TRSPPELLLALDG...APVECCPGSCPKGELPCRDLSPERAPE
NC_009715.1_1801466_1801996  ADEPDYEAALKAINAASTCC.GSUH.....

```

Figure S5. Comparison of *C. curvus* thiol peroxidase with homologous selenoproteins. The translation of a putative Sec-containing ORF of *C. curvus* (NC\_009715.1\_1801466\_1801996) is aligned with the five top scoring blastp hit of dbTEU. Conserved columns are shaded in red, putative Sec (U) residues are shaded in orange. The alignment was conducted with Clustalw with manual adjustments.

```

>Fdh
AGCWMGAAUY UGA CAYAGYGCMACAG UCGCCGGUGUGGCGA AUACWUKKGGUUAUGGYGCKAUGACAAAYCAY
..... (g=0.25)
..... (g=0.5)
.....(((.....)))..... (g=1)
.....(.....(((.....))).....)..... (g=2)
.....((((.....))).....)..... (g=4)
.....((((.....))).....)..... (g=6)
.....((((.....))).....)..... (g=8)
.....((((.....))).....)..... (g=16)

>SelD
AKSYGCKGGU UGA GCKGCYAARSU RGRYCYGKMRGRYCU WMMCAAAYWYYKSCaakCUYAYHYAAMMYCAU
..... (g=0.25)
.....(((.....)))..... (g=0.5)
.....((((.....)))..... (g=1)
.....((((.....)))..... (g=2)
.....((((.....)))..... (g=4)
.....((((.....)))..... (g=6)
.....((((.....)))..... (g=8)
.....((((.....)))..... (g=16)

>SelW
YUGCAAYYYU UGA ---AAYUWYCKYCCRSWAG CUKCUMGKKUWGMAG AUGARHUAMWAAAABRAUUUYMSWGRU
..... (g=0.125)
..... (g=0.25)
.....(((.....)))..... (g=0.5)
.....((((.....)))..... (g=1)
.....((((.....)))..... (g=2)
.....((((.....)))..... (g=4)
.....((((.....)))..... (g=6)
.....((((.....)))..... (g=8)
.....((((.....)))..... (g=16)

```

Figure S6. **Predicted RNA secondary structures around Sec-encoding codons of  $\epsilon$ -proteobacteria selenoproteins.** The analysis was conducted with the Centroid\_alifold program based on multiple alignments of the Fdh, SelD, and SelW families using different weights (g) for base pairs. The Sec-encoding UGA codon and the common hairpin structure are highlighted in yellow.

**A**

```

H_bizzozeronii_CIII-1      GAAATTGGGGGGGGC TTTAGAGCA CATGAACTCTTAGA GAGTGTAAACCATCTTA
H_bizzozeronii_[ERR162941] GAAATTGGGGGGGGC TTTAGAGCA CATGAACTCTTAGA GAGTGTAAACCATCTTA
H_bizzozeronii_CCUG       GAAATTGGGGGGGGT TTTAGAGCA CATGAACTCTTAGA AAGTGTAAACTCATCTTA
H_felis                    GAAATTGGGGGGAGG TTTAGAGCG CATGAACTCTTAGA GAGTGTGACTCATCTTA

                                     1385564
                                     ↓
H_bizzozeronii_CIII-1      AGTTAGTGGGGAGCAGCAATAAAACCTATTGCGCGATTATAAGAATGCTTGCA
H_bizzozeronii_[ERR162941] AGTTAGTGGGGAGCAGCAATAAAACCTATTGCGCGATTATAAGAATGCTTGCA
H_bizzozeronii_CCUG       AATTGTTGGGGAGCAGCAATAAAACCTATTGCGCGATTATAAGAATGCTTGCA
H_felis                    AATTAGTGGGGAGCAGCAATAAAACCTATTGCGCGATTATAAGAATGCTTGTA

H_bizzozeronii_CIII-1      GC GATGCCAGCGCACTA CTTGCTAGCGTGCATTGGAGTAAATTTTTCATGAGCGG
H_bizzozeronii_[ERR162941] GC GATGCCAGCGCACTA CTTGCTAGCGTGCATTGGAGTAAATTTTTCATGAGCGG
H_bizzozeronii_CCUG       ATGATGCCAGCGCGCTA ATTGCTAGCGTGCATTGGAGCAATTTTTCATGAGCGG
H_felis                    ATGATA CCAGCGCACTA ATTGCTAGCGTGCATTGGAGCAATTTTTCATGAGCGG

```

**B**

| Genome Accession | Species                       | Annotated CDS                        | Predicted CDS    | Sequence variation |
|------------------|-------------------------------|--------------------------------------|------------------|--------------------|
| NC_014810.2      | <i>H. felis</i> ATCC 49179    | 703832..704323                       | 702989..704323   |                    |
| NC_015674.1      | <i>H. bizzozeronii</i> CIII-1 | 1384976..1385575<br>1385634..1386278 | 1384976..1386278 | g.1385564del       |
| NC_017735.1      | <i>H. cetorum</i> MIT 99-5656 | 944261..945457                       | 944093..945457   |                    |
| NC_017737.1      | <i>H. cetorum</i> MIT 00-7128 | c264740..265936                      | c264740..266104  |                    |

Figure S7. **Redefinition of coding sequence boundaries in Sela sequences.** (A) Portion of the Sela coding sequence of the *H. bizzozeronii* CIII-1 genome (NC\_015674.1:1384976..1386278) aligned with homologous sequences from *H. felis* and other *H. bizzozeronii* isolates ('CCUG' and 'ERR162941'). The possible frameshift error in the *H. bizzozeronii* CIII-1 Sela sequence is indicated by an arrow. The sequence labeled 'ERR162941' was obtained by a Velvet assembly (k-mer=31; cov\_cutoff=auto) of *H. bizzozeronii* reads available in the NCBI Sequence Reads Archive (Project accession: ERX138816; run: ERR162941). (B) Comparison of the annotated Sela coding sequence boundaries with the coordinates inferred by tblastn searches. The sequence variation in NC\_015674.1 is proposed based on the above alignment and the evidence for a Sec-decoding trait in this organism (see fig. 3).



|                        | H.acino-<br>nychis | H.p<br>26695 | H.p<br>Shi417 | H.p Gam-<br>bia94/2 | H.p P12 | H.p G27 | H.p B8 | H.p<br>ELS37 | H.p<br>India7 | H.p<br>PeCan4 |
|------------------------|--------------------|--------------|---------------|---------------------|---------|---------|--------|--------------|---------------|---------------|
| <b>H. acynonychis</b>  |                    |              |               |                     |         |         |        |              |               |               |
| <b>H.p_26695</b>       | 0.261              |              |               |                     |         |         |        |              |               |               |
| <b>H.p_Shi417</b>      | 0.289              | 0.365        |               |                     |         |         |        |              |               |               |
| <b>H.p_Gambia94/2</b>  | 0.265              | 0.446        | 0.369         |                     |         |         |        |              |               |               |
| <b>H.p_P12</b>         | 0.235              | 0.316        | 0.276         | 0.473               |         |         |        |              |               |               |
| <b>H.p_G27</b>         | 0.258              | 0.327        | 0.291         | 0.598               | 0.371   |         |        |              |               |               |
| <b>H.p_B8</b>          | 0.235              | 0.309        | 0.284         | 0.441               | 0.230   | 0.325   |        |              |               |               |
| <b>H.p_ELS37</b>       | 0.249              | 0.385        | 0.340         | 0.521               | 0.411   | 0.460   | 0.348  |              |               |               |
| <b>H.p_India7</b>      | 0.229              | 0.244        | 0.294         | 0.495               | 0.262   | 0.298   | 0.220  | 0.459        |               |               |
| <b>H.p_PeCan4</b>      | 0.257              | 0.536        | 0.282         | 0.377               | 0.247   | 0.327   | 0.324  | 0.357        | 0.293         |               |
| <b>H.p_SouthAfrica</b> | 0.343              | 0.295        | 0.248         | 0.375               | 0.288   | 0.311   | 0.296  | 0.342        | 0.246         | 0.261         |

Figure S8. dN/dS ratios in the SclA coding sequences of *H. pylori* and *H. acynonychis*. The ratio of non-synonymous substitutions per non-synonymous site (dN) to synonymous substitutions per synonymous site (dS) in pairwise comparisons was calculated on the multiple alignment of SclA coding sequence with the maximum-likelihood method implemented in the Codeml program of the PAML package.

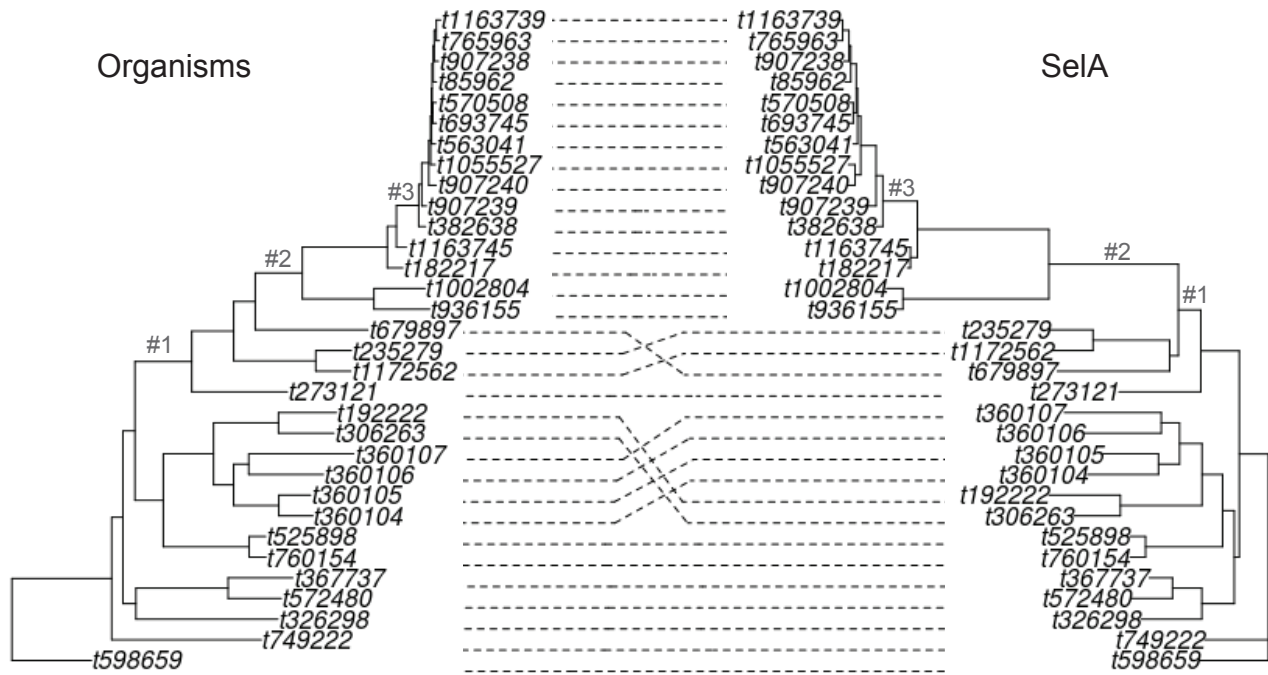

Figure S9. **Comparison of the organism tree and the Sela tree in  $\epsilon$ -proteobacteria.** The left tree represents the maximum-likelihood phylogeny obtained with 454 proteins of  $\epsilon$ -proteobacteria (Wang and Wu 2013), the right tree represents the maximum-likelihood phylogeny of Sela proteins. Dashed lines connect tips with the same taxonomy id. Crossing dashed lines represent the rearrangements required to reconcile the two trees, as determined by the Cophyplot routine of the APE package.

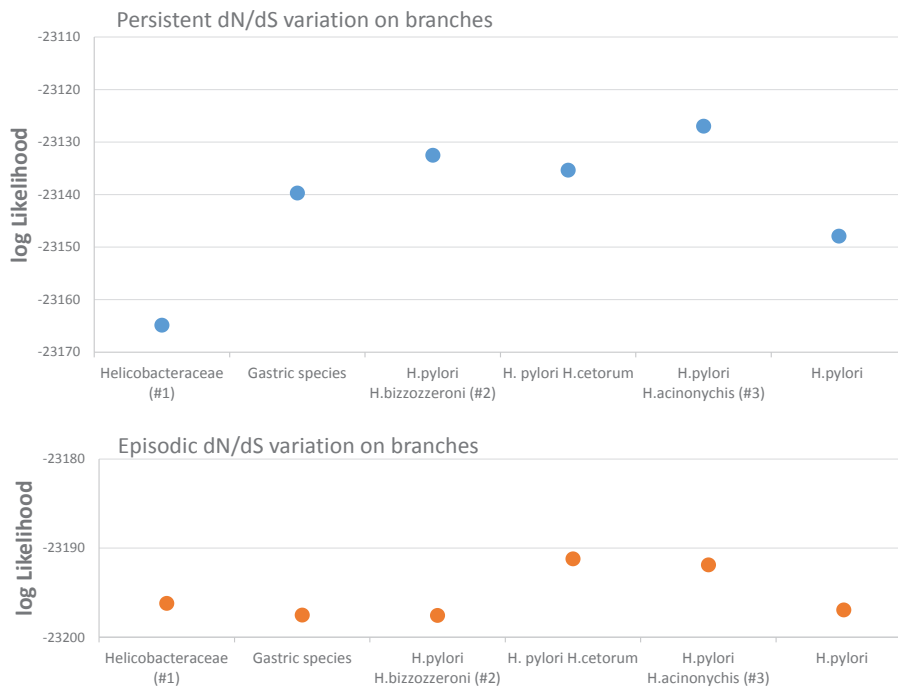

**Figure S10. Comparison of different models of dN/dS variation of the *selA* gene along branches.** The log Likelihood of models assuming variation of dN/dS in the *selA* gene along the Helicobacteraceae phylogeny is plotted for different branches of the tree. Tree topology and branch numbering is as in figs. 3 and S9. Upper panel: variations of dN/dS were propagated to the descending branches (persistent variations). Lower panel: variations of dN/dS were not propagated to the descending branches (episodic variations).

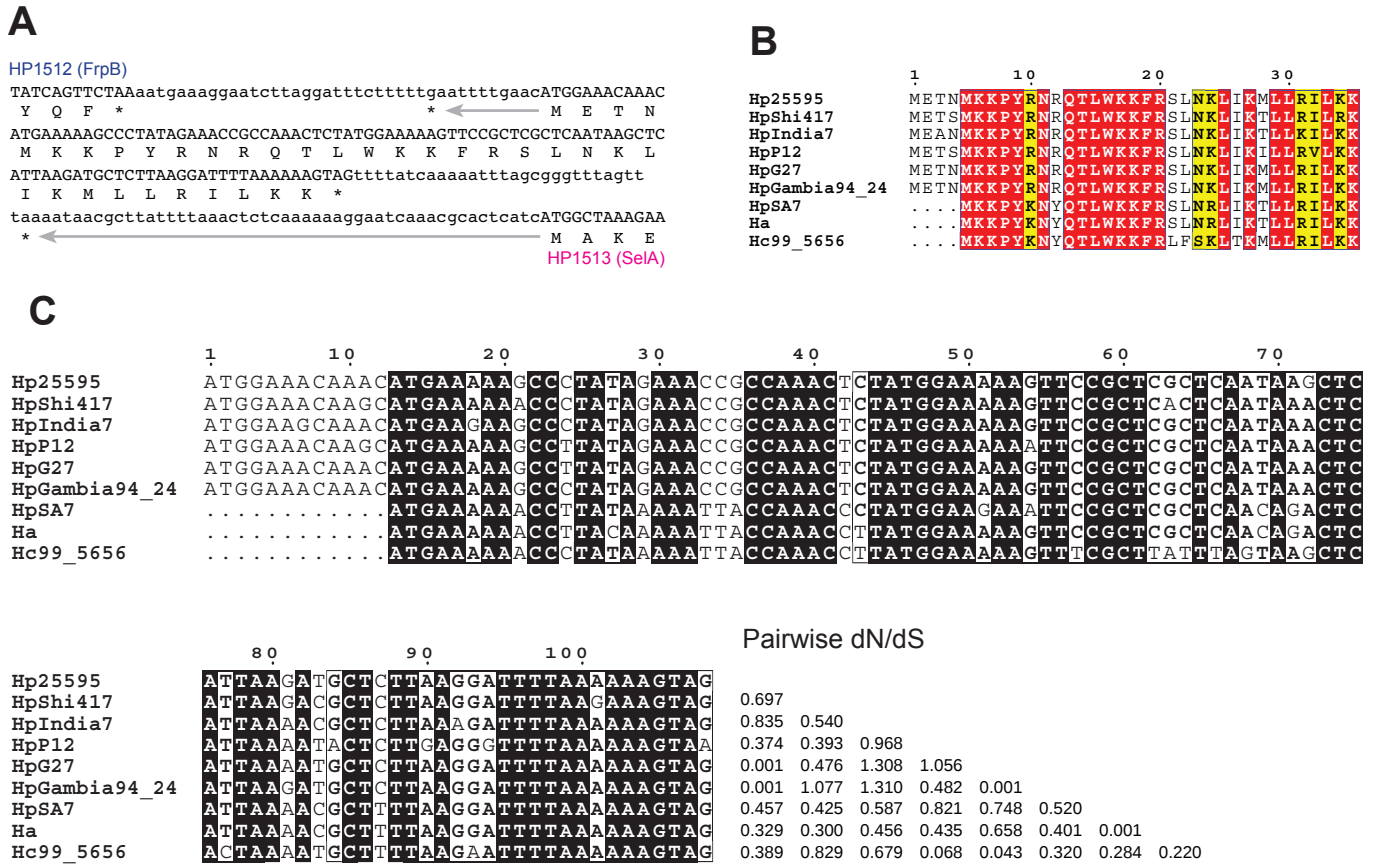

Figure S11. Evidence for a closed frame and presence of a coding ORF upstream of *H. pylori* Sela. (A) DNA sequence of the intergenic region between HP1512 (NikR-regulated outer membrane protein) and HP1513 (Sela). Proposed coding sequences are shown in capital letters; translation is shown below the sequence. In-frame downstream and upstream STOP codons are represented by asterisks. (B) Protein alignment of the Sela 5'-ORF in *Helicobacter* genomes, highlighting strictly conserved positions (red) and conservative amino acid substitutions (yellow). (C) Coding sequence alignment of the Sela 5'-ORF along with dN/dS ratios from pairwise comparisons.

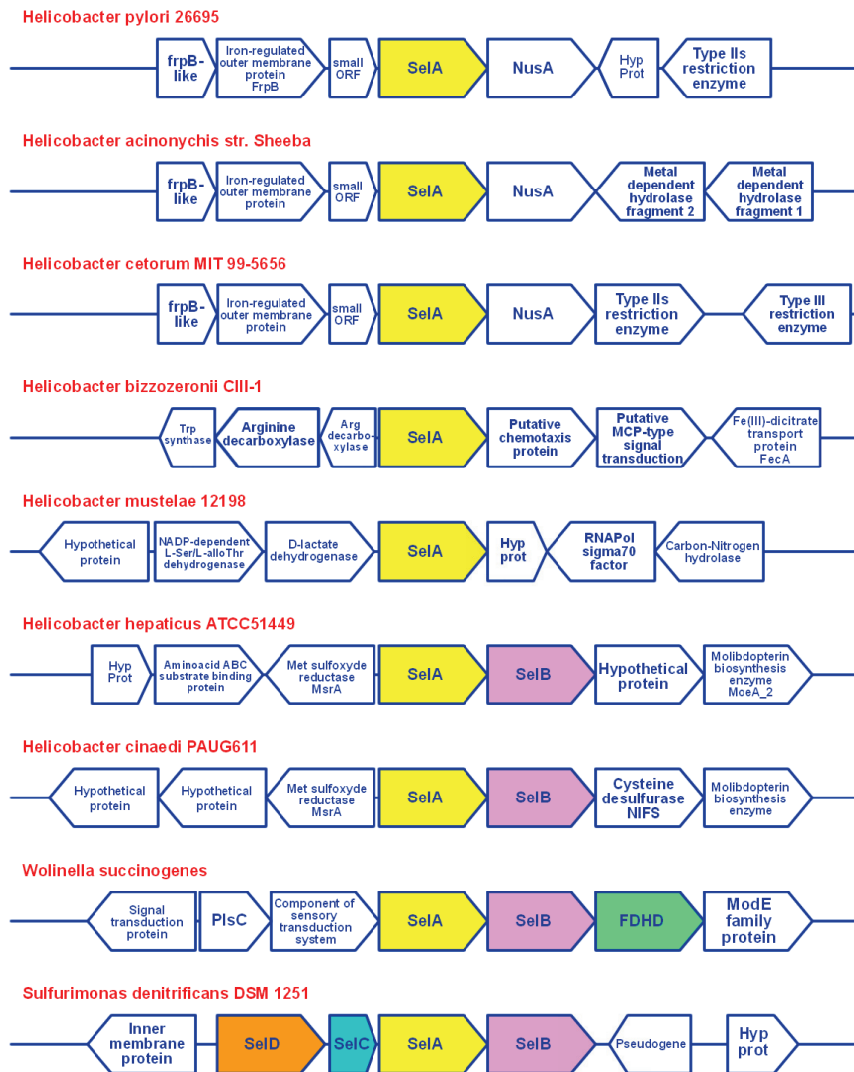

Figure S12. **Genetic neighborhood of the *selA* gene in Helicobacteriaceae.** Boxes representing genes involved in Sec-decoding traits and genes encoding selenoproteins are colored. Same-colored boxes represent orthologous genes across the genomes.

**Table S1. Genes involved in the Sec-decoding trait and selenometabolism identified in Epsilonproteobacteria <sup>a</sup>**

| Taxid   | Species                                | SeIA                              | SeIB                  | SeIC                              | SeID                                | MnmH                  | YedF                  |
|---------|----------------------------------------|-----------------------------------|-----------------------|-----------------------------------|-------------------------------------|-----------------------|-----------------------|
| 367737  | Arcobacter butzleri RM4018             | YP_001490447.1 5e-107             | YP_001490448.1 7e-134 | NC_009850.1:1529457-1529553 87.47 | YP_001490437.1 4e-75                |                       |                       |
| 572480  | Arcobacter nitrofigilii DSM 7299       | YP_003655158.1 8e-109             | YP_003655159.1 1e-134 | NC_014166.1:977634-977731 82.23   | NC_014166.1:976595-977629 4e-76     | YP_003655616.1 5e-96  | YP_003655154.1 5e-20  |
| 944547  | Arcobacter sp. L                       |                                   |                       |                                   |                                     |                       |                       |
| 360104  | Campylobacter concisus 13826           | YP_001466208.1 7e-106             | YP_001466209.1 5e-180 | NC_009802.1:1788312-1788407 90.36 | NC_009802.1:1726587-1727609 1e-89   | YP_001466733.1 4e-23  | YP_001467547.1 2e-32  |
| 360105  | Campylobacter curvus 525.92            | YP_001408945.1 4e-112             | YP_001408946.1 3e-179 | NC_009715.1:1748632-1748727 88.40 | NC_009715.1:c1656276-1657316 2e-76  | YP_001408347.1 2e-24  | YP_001408903.1 7e-34  |
| 360106  | Campylobacter fetus subsp. fetus 82-40 | YP_892679.1 2e-122                | YP_892680.1 3e-156    | NC_008599.1:335720-335815 85.58   | NC_008599.1:308394-309425 2e-76     |                       | YP_891541.1 2e-33     |
| 360107  | Campylobacter hominis ATCC BAA-381     | YP_001406339.1 8e-103             | YP_001406340.1 1e-158 | NC_009714.1:280399-280494 92.75   | YP_001407288.1 1e-76                |                       | YP_001407289.1 1e-34  |
| 192222  | Campylobacter jejuni ATCC 700819       | YP_002344766.1 1 0.0              | YP_002344767.1 0.0    | NC_002163.1:1432373-1432468 96.65 | NC_002163.1:c1439168-1440190 5e-176 | YP_002343934.1 2e-26  | YP_002344884.1 3e-102 |
| 306263  | Campylobacter lari RM2100              | YP_002575855.1 5e-160             | YP_002575856.1 0.0    | NC_012039.1:343444-343539 93.39   | NC_012039.1:335663-336694 3e-102    | YP_002575503.1 7e-29  | YP_002574971.1 1e-59  |
| 382638  | Helicobacter acinonychis str. Sheeba   | YP_663931.1 8e-51                 |                       |                                   |                                     |                       |                       |
| 1002804 | Helicobacter bizzozeronii CIII-1       | NC_015674.1:1384976-1386278 3e-32 | YP_004606986.1 6e-118 | NC_015674.1:696633-696729 86.98   | NC_015674.1:c790126-791136 3e-57    |                       | YP_004607782.1 2e-18  |
| 182217  | Helicobacter cetorum MIT 00-7128       | NC_017737:c264740-266104 5e-65    | YP_006222572.1 2e-98  | NC_017737.1:723764-723859 95.12   | NC_017737.1:c1260015-1261040 5e-65  | YP_006223140.1 5e-28  |                       |
| 1163745 | Helicobacter cetorum MIT 99-5656       | NC_017735.1:944093-945457 6e-63   | YP_006221630.1 4e-99  | NC_017735.1:1339955-1340050 95.12 | NC_017735.1:c1168443-1169468 6e-63  | YP_006220516.1 3e-29  |                       |
| 1172562 | Helicobacter cinaedi PAGU611           | YP_006235949.1 4e-96              | YP_006235950.1 9e-122 | NC_017761.1:683686-683781 97.49   | NC_017761.1:c901529-902617 1e-56    |                       | YP_006235255.1 3e-24  |
| 936155  | Helicobacter felis ATCC 49179          | NC_014810.2:702989-704323 1e-39   | YP_004073919.1 3e-103 | NC_014810.2:420555-420651 89.24   | NC_014810.2:108644-109654 4e-58     |                       | YP_004073732.1 4e-12  |
| 235279  | Helicobacter hepaticus ATCC 51449      | NP_860271.1 4e-92                 | NP_860272.1 3e-119    | NC_004917.1:419603-419698 99.46   | NC_004917.1:c1658852-1659898 3e-54  |                       | NP_861267.1 1e-25     |
| 679897  | Helicobacter mustelae 12198            | YP_003516820.1 2e-90              | YP_003517390.1 7e-104 | NC_013949.1:727834-727929 89.16   | NC_013949.1:c958499-959524 9e-54    | YP_003516376.1 2e-30  |                       |
| 85962   | Helicobacter pylori 26695              | NP_208304.1 1e-47                 |                       |                                   |                                     |                       |                       |
| 1163739 | Helicobacter pylori Shi417             | YP_006225087.1 1e-51              |                       |                                   |                                     |                       |                       |
| 907240  | Helicobacter pylori Gambia94/24        | YP_005781246.1 1e-47              |                       |                                   |                                     |                       |                       |
| 570508  | Helicobacter pylori P12                | YP_002302119.1 2e-49              |                       |                                   |                                     |                       |                       |
| 563041  | Helicobacter pylori G27                | YP_002267046.1 3e-49              |                       |                                   |                                     |                       |                       |
| 693745  | Helicobacter pylori B8                 | YP_003728036.1 4e-47              |                       |                                   |                                     |                       |                       |
| 1055527 | Helicobacter pylori ELS37              | YP_005425646.1 3e-48              |                       |                                   |                                     |                       |                       |
| 907238  | Helicobacter pylori India7             | YP_005782778.1 7e-52              |                       |                                   |                                     |                       |                       |
| 765963  | Helicobacter pylori PeCan4             | YP_003927743.1 4e-52              |                       |                                   |                                     |                       |                       |
| 907239  | Helicobacter pylori SouthAfrica7       | YP_005772001.1 1e-50              |                       |                                   |                                     |                       |                       |
| 598659  | Nautilia profundicola AmH              | YP_002607717.1 1e-104             | YP_002607718.1 2e-146 | NC_012115.1:1239494-1239590 87.95 | YP_002607680.1 3e-82                | YP_002607706.1 6e-23  | YP_002607685.1 1e-28  |
| 749222  | Nitratifactor salsuginis DSM 16511     | YP_004168822.1 1e-122             | YP_004168821.1 1e-134 | NC_014935.1:1763108-1763204 87.12 | YP_004167329.1 8e-77                | YP_004167330.1 1e-92  | YP_004168824.1 3e-27  |
| 387092  | Nitratiruptor sp. SB155-2              |                                   |                       |                                   |                                     |                       |                       |
| 709032  | Sulfuricurvum kujense DSM 16994        |                                   |                       |                                   |                                     |                       |                       |
| 563040  | Sulfurimonas autotrophica DSM 16294    |                                   |                       |                                   | YP_003891308.1 6e-51                | YP_003891307.1 1 0.0  |                       |
| 326298  | Sulfurimonas denitrificans DSM 1251    | YP_393345.1 2e-113                | YP_393346.1 4e-135    | NC_007575.1:862218-862314 80.85   | NC_007575.1:861177-862211 4e-75     | YP_393674.1 2e-105    |                       |
| 760154  | Sulfurospirillum barnesii SES-3        | YP_006405073.1 4e-105             | YP_006405074.1 4e-142 | NC_018002.1:2149993-2150089 81.95 | YP_006405044.1 3e-75                | YP_006404163.1 5e-30  | YP_006405045.1 2e-36  |
| 525898  | Sulfurospirillum deleyianum DSM 6946   | YP_003305129.1 1e-105             | YP_003305130.1 5e-141 | NC_013512.1:2018206-2018302 81.95 | YP_003305100.1 6e-76                | YP_003304359.1 3e-26  | YP_003305101.1 3e-33  |
| 387093  | Sulfurovum sp. NBC37-1                 |                                   |                       |                                   | YP_001359133.1 1e-54                | YP_001359132.1 1e-105 |                       |
| 273121  | Wolinella succinogenes DSM 1740        | NP_907051.1 1e-101                | NP_907050.1 3e-132    | NC_005090.1:797104-797199 81.79   | NP_907200.1 2e-71                   | NP_908105.1 1e-31     | NP_907203.1 3e-29     |

<sup>a</sup>Protein identification was based on homology searches with bona fide SeIA (YP\_001001036.1), SeIB (YP\_001001037.1), and SeID (YP\_001001151.1) sequences from *C. jejuni*, and with bona fide MnmH (YP\_003891307.1) and YedF (YP\_002574971.1) sequences from *S. autotrophica* and *C. lari*, respectively. Identification of tRNA<sup>Sec</sup> (SeIC) genes was based on tRNA<sup>Sec</sup>-SE search. Genes are indicated by protein accession numbers or genomic coordinates. Blast e-values and tRNA<sup>Sec</sup>-SE scores are reported. Unannotated or misannotated genes (see Fig. S7 and Table S2 for details) are shown in blue.

**Table S2. Sec-encoding proteins identified in Epsilonproteobacteria genomes**

| Coding sequence              | Protein <sup>a</sup> | blastx best hit | %id | Query Start | Query End | Sbj. Start | Sbj. End | Note         | Selenoprotein identification                    |
|------------------------------|----------------------|-----------------|-----|-------------|-----------|------------|----------|--------------|-------------------------------------------------|
| NC_002163.1:c1446341-1449145 | FdhO                 | YP_002344890.1  | 100 | 1           | 2802      | 1          | 934      |              | GenBank                                         |
| NC_005090.1:694979-697810    | FdhO                 | NP_906953.1     | 100 | 1           | 2829      | 1          | 943      |              | GenBank                                         |
| NC_007575.1:c850305-853118   | FdhO                 | YP_393335.2     | 100 | 16          | 2811      | 1          | 932      |              | GenBank                                         |
| NC_009850.1:c1505948-1508749 | FdhO                 | YP_001490422.1  | 100 | 1           | 2799      | 1          | 933      |              | GenBank                                         |
| NC_012039.1:330854-333676    | FdhO                 | YP_002574968.1  | 100 | 1           | 2820      | 1          | 940      |              | GenBank                                         |
| NC_015674.1:1254832-1257606  | FdhO                 | YP_004608051.1  | 100 | 1           | 2772      | 12         | 935      |              | GenBank                                         |
| NC_004917.1:c217811-220633   | FdhO                 | NP_859759.1     | 100 | 577         | 2820      | 1          | 748      | 5' truncated | dbTEU <sup>b</sup> / bSECISearch <sup>c</sup>   |
|                              | FdhO                 | NP_859760.1     | 100 | 1           | 552       | 1          | 184      | 3' truncated |                                                 |
| NC_008599.1:c1514186-1517143 | FdhO                 | YP_892675.1     | 100 | 586         | 2955      | 1          | 790      | 5' truncated | dbTEU <sup>b</sup> / bSECISearch <sup>c</sup>   |
| NC_009714.1:381285-384239    | FdhO                 | YP_002574968.1  | 68  | 43          | 2952      | 1          | 940      | missing      | dbTEU <sup>b</sup> / bSECISearch <sup>c</sup>   |
| NC_009715.1:c1695733-1698711 | FdhO                 | YP_001408941.1  | 100 | 589         | 2976      | 1          | 796      | 5' truncated | dbTEU <sup>b</sup> / bSECISearch <sup>c</sup>   |
| NC_009715.1:c745343-747622   | FdhH                 | YP_001467138.1  | 83  | 520         | 2277      | 1          | 585      | missing      | dbTEU <sup>b</sup> / bSECISearch <sup>c</sup>   |
| NC_009802.1:1290428-1292704  | FdhH                 | YP_001467138.1  | 100 | 520         | 2274      | 1          | 585      | 5' truncated | dbTEU <sup>b</sup> / bSECISearch <sup>c</sup>   |
|                              | FdhH                 | YP_001467137.1  | 100 | 1           | 420       | 1          | 140      | 3' truncated |                                                 |
| NC_009802.1:1622807-1625635  | FdhO                 | YP_001467445.1  | 100 | 610         | 2826      | 1          | 739      | 5' truncated | dbTEU <sup>b</sup> / bSECISearch <sup>c</sup>   |
| NC_009802.1:301772-304747    | FdhO                 | YP_001466213.1  | 100 | 583         | 2973      | 1          | 797      | 5' truncated | dbTEU <sup>b</sup> / bSECISearch <sup>c</sup>   |
| NC_009802.1:c1616627-1618870 | FdhH                 | YP_001467440.1  | 100 | 1           | 420       | 1          | 140      | 3' truncated | dbTEU <sup>b</sup> / bSECISearch <sup>c</sup>   |
|                              | FdhH                 | YP_001467439.1  | 100 | 472         | 2241      | 1          | 590      | 5' truncated |                                                 |
| NC_012115.1:1203781-1206606  | FdhO                 | YP_002607700.1  | 100 | 601         | 2823      | 1          | 741      | 5' truncated | dbTEU <sup>b</sup> / bSECISearch <sup>c</sup>   |
|                              | FdhO                 | YP_002607699.1  | 100 | 1           | 549       | 1          | 183      | 3' truncated |                                                 |
| NC_013512.1:806764-809622    | FdhO                 | YP_003303872.1  | 100 | 610         | 2856      | 1          | 749      | 5' truncated | dbTEU <sup>b</sup> / bSECISearch <sup>c</sup>   |
|                              | FdhO                 | YP_003303871.1  | 100 | 1           | 558       | 1          | 186      | 3' truncated |                                                 |
| NC_013512.1:c2082230-2085031 | FdhO                 | YP_003305122.1  | 100 | 1           | 501       | 22         | 188      | 3' truncated | dbTEU <sup>b</sup> / bSECISearch <sup>c</sup>   |
|                              | FdhO                 | YP_003305121.1  | 100 | 553         | 2799      | 1          | 749      | 5' truncated |                                                 |
| NC_014166.1:c957134-959935   | FdhO                 | YP_003655137.1  | 100 | 1           | 543       | 1          | 181      | 5' truncated | dbTEU <sup>b</sup> / bSECISearch <sup>c</sup>   |
|                              | FdhO                 | YP_003655136.1  | 100 | 595         | 2799      | 1          | 735      | 3' truncated |                                                 |
| NC_014166.1:c964208-967054   | FdhO                 | YP_003655143.1  | 100 | 583         | 2844      | 1          | 754      | 5' truncated | dbTEU <sup>b</sup> / bSECISearch <sup>c</sup>   |
|                              | FdhO                 | YP_003655144.1  | 100 | 1           | 558       | 1          | 186      | 3' truncated |                                                 |
| NC_014810.2:127304-130078    | FdhO                 | YP_004072834.1  | 100 | 541         | 2772      | 1          | 744      | 5' truncated | dbTEU <sup>b</sup> / bSECISearch <sup>c</sup>   |
|                              | FdhO                 | YP_004072833.1  | 100 | 1           | 489       | 12         | 174      | 3' truncated |                                                 |
| NC_017735.1:1130767-1133580  | FdhO                 | YP_006221291.1  | 100 | 580         | 2811      | 1          | 744      | 5' truncated | dbTEU <sup>b</sup> / bSECISearch <sup>c</sup>   |
|                              | FdhO                 | YP_006221290.1  | 100 | 1           | 528       | 1          | 176      | 3' truncated |                                                 |
| NC_017737.1:1409067-1411895  | FdhO                 | YP_006223203.1  | 100 | 595         | 2826      | 1          | 744      | 5' truncated | dbTEU <sup>b</sup> / bSECISearch <sup>c</sup>   |
|                              | FdhO                 | YP_006223202.1  | 100 | 16          | 543       | 1          | 176      | 3' truncated |                                                 |
| NC_017761.1:599104-601923    | FdhO                 | YP_006234982.1  | 100 | 577         | 2817      | 1          | 747      | 5' truncated | dbTEU <sup>b</sup> / bSECISearch <sup>c</sup>   |
| NC_018002.1:834797-837655    | FdhO                 | YP_006403736.1  | 100 | 610         | 2856      | 1          | 749      | 5' truncated | dbTEU <sup>b</sup> / bSECISearch <sup>c</sup>   |
|                              | FdhO                 | YP_006403735.1  | 100 | 1           | 558       | 1          | 186      | 3' truncated |                                                 |
| NC_018002.1:c2174715-2177576 | FdhO                 | YP_006405067.1  | 100 | 1           | 558       | 1          | 186      | 3' truncated | dbTEU <sup>b</sup> / bSECISearch <sup>c</sup>   |
|                              | FdhO                 | YP_006405066.1  | 100 | 610         | 2859      | 1          | 750      | 5' truncated |                                                 |
| NC_012115.1:c1187216-1188259 | SelD                 | YP_002607680.1  | 100 | 1           | 1041      | 1          | 347      |              | GenBank                                         |
| NC_014935.1:299621-300664    | SelD                 | YP_004167329.1  | 100 | 10          | 1041      | 1          | 344      |              | GenBank                                         |
| NC_017737.1:c1260015-1261040 | SelD                 | YP_006223057.1  | 100 | 82          | 1023      | 1          | 314      | 5' truncated | dbTEU <sup>b</sup> / bSECISearch <sup>c</sup>   |
| NC_017735.1:c1168443-1169468 | SelD                 | YP_006221319.1  | 100 | 82          | 1023      | 1          | 314      | 5' truncated | dbTEU <sup>b</sup> / bSECISearch <sup>c</sup>   |
| NC_014166.1:976595-977629    | SelD                 | YP_003655157.1  | 100 | 58          | 1032      | 1          | 325      | 5' truncated | dbTEU <sup>b</sup> / bSECISearch <sup>c</sup>   |
| NC_009802.1:1726587-1727609  | SelD                 | YP_001467548.1  | 100 | 277         | 1020      | 1          | 248      | 5' truncated | dbTEU <sup>b</sup> / bSECISearch <sup>c</sup>   |
| NC_007575.1:861177-862211    | SelD                 | YP_393344.1     | 100 | 58          | 1032      | 1          | 325      | 5' truncated | dbTEU <sup>b</sup> / bSECISearch <sup>c</sup>   |
| NC_004917.1:c1658852-1659898 | SelD                 | NP_861265.1     | 100 | 154         | 1044      | 1          | 297      | 5' truncated | dbTEU <sup>b</sup> / bSECISearch <sup>c</sup>   |
| NC_002163.1:c1439168-1440190 | SelD                 | YP_002344883.1  | 100 | 97          | 1020      | 1          | 308      | 5' truncated | dbTEU <sup>b</sup> / bSECISearch <sup>c</sup>   |
| NC_017761.1:c901529-902617   | SelD                 | YP_006235254.1  | 100 | 112         | 1086      | 1          | 325      | 5' truncated | dbTEU <sup>b</sup> / bSECISearch <sup>c</sup>   |
| NC_015674.1:c790126-791136   | SelD                 | YP_004607535.1  | 100 | 52          | 1008      | 1          | 319      | 5' truncated | dbTEU <sup>b</sup> / bSECISearch <sup>c</sup>   |
| NC_014810.2:108644-109654    | SelD                 | YP_004072817.1  | 100 | 52          | 1008      | 1          | 319      | 5' truncated | dbTEU <sup>b</sup> / bSECISearch <sup>c</sup>   |
| NC_012039.1:335663-336694    | SelD                 | YP_002574972.1  | 100 | 70          | 1029      | 1          | 320      | 5' truncated | dbTEU <sup>b</sup> / bSECISearch <sup>c</sup>   |
| NC_008599.1:308394-309425    | SelD                 | YP_891542.1     | 100 | 79          | 1029      | 1          | 317      | 5' truncated | dbTEU <sup>b</sup> / bSECISearch <sup>c</sup>   |
| NC_013949.1:c958499-959524   | SelD                 | YP_003516809.1  | 100 | 118         | 1023      | 1          | 302      | 5' truncated | dbTEU <sup>b</sup> / bSECISearch <sup>c</sup>   |
| NC_009715.1:c1656276-1657316 | SelD                 | YP_891542.1     | 61  | 73          | 1005      | 2          | 309      | missing      | dbTEU <sup>b</sup> / bSECISearch <sup>c</sup>   |
| NC_014166.1:c949137-949394   | SelW-like            | YP_003655126.1  | 100 | 1           | 255       | 1          | 85       |              | GenBank                                         |
| NC_002163.1:c671511-671753   | SelW-like            | YP_002575469.1  | 49  | 234         | 1         | 1          | 78       | missing      | dbTEU <sup>b</sup> / bSECISearch <sup>c</sup>   |
| NC_008599.1:1234401-1234658  | SelW-like            | YP_003655126.1  | 32  | 16          | 237       | 1          | 75       | missing      | dbTEU <sup>b</sup>                              |
| NC_008599.1:1234830-1235069  | SelW-like            | YP_003655126.1  | 37  | 1           | 237       | 1          | 81       | missing      | dbTEU <sup>b</sup> / bSECISearch <sup>c</sup>   |
| NC_009715.1:c589810-590067   | SelW-like            | YP_003655126.1  | 42  | 1           | 237       | 1          | 78       | missing      | dbTEU <sup>b</sup> / bSECISearch <sup>c</sup>   |
| NC_009802.1:c1487351-1487608 | SelW-like            | YP_003655126.1  | 43  | 1           | 237       | 1          | 78       | missing      | dbTEU <sup>b</sup> / bSECISearch <sup>c</sup>   |
| NC_012039.1:854195-854434    | SelW-like            | YP_002575469.1  | 97  | 234         | 1         | 1          | 78       | wrong frame  | dbTEU <sup>b</sup> / bSECISearch <sup>c</sup>   |
| NC_014935.1:c600388-600780   | Tr                   | YP_004167611.1  | 100 | 1           | 390       | 1          | 130      |              | GenBank                                         |
| NC_009715.1:1801466-1801996  | Perox                | YP_001409037.1  | 100 | 1           | 525       | 1          | 175      | 3' truncated | tblastn <sup>d</sup> / bSECISearch <sup>c</sup> |
| NC_012039.1:1300804-1300998  | DUF466               | YP_002575916.1  | 100 | 1           | 189       | 1          | 63       | 3' truncated | cmsearch / tblastn <sup>e</sup>                 |
| NC_004917.1:1706005-1706244  | DUF466               | NP_861314.1     | 100 | 1           | 234       | 1          | 78       | 3' truncated | cmsearch / tblastn <sup>e</sup>                 |
| NC_017761.1:c1129343-1129546 | DUF466               | YP_003304245.1  | 46  | 64          | 198       | 19         | 65       | missing      | cmsearch / tblastn <sup>e</sup>                 |
| NC_002163.1:c852178-852378   | DUF466               | YP_002344314.1  | 100 | 1           | 195       | 1          | 65       | 3' truncated | tfastx <sup>f</sup>                             |
| NC_008599.1:c58283-58486     | DUF466               | YP_891281.1     | 100 | 1           | 198       | 1          | 66       | 3' truncated | tfastx <sup>f</sup>                             |

<sup>a</sup>Protein definition based on homology with dbTEU or GenBank. Distinction between formate dehydrogenase H (FdhH) and formate dehydrogenase O (FdhO) was based on the phylogenetic relation with known *E. coli* proteins.

<sup>b</sup>Identified by homology (tblastn) with U-containing proteins in dbTEU

<sup>c</sup>Optimal SECIS element identified by bSECISearch

<sup>d</sup>Identified by tblastn search with U-containing ORFs translated from complete genomes

<sup>e</sup>Identified by the SECIS covariance model followed by a tblastn search with full translations

<sup>f</sup>Identified by homology (tfastx36 -m BB) with U-containing ORFs of the same family

**Table S3. Position of Sec-encoding codons and equivalent Cys-encoding codons in epsilonproteobacterial genomes<sup>a</sup>**

| Species                                              | Accession   | Fdh                                             | SelD      | SelW-like              | Tr        | Perox     | DUF466    |
|------------------------------------------------------|-------------|-------------------------------------------------|-----------|------------------------|-----------|-----------|-----------|
| <i>Arcobacter butzleri</i> RM4018                    | NC_009850.1 | -U1508206                                       | +C1523183 |                        |           | +C561644  | -C742321  |
| <i>Arcobacter nitrofigilis</i> DSM 7299              | NC_014166.1 | -U959392<br>-U966496                            | +U976640  | -U949364               |           | +C781750  |           |
| <i>Arcobacter</i> sp. L                              | NC_017192.1 | -C1428915                                       |           |                        |           | +C683355  |           |
| <i>Campylobacter concisus</i> 13826                  | NC_009802.1 | +U302303<br>+U1290848<br>-U1618450<br>+U1623365 | +U1726635 | -U1487578              |           | +C1921514 |           |
| <i>Campylobacter curvus</i> 525.92                   | NC_009715.1 | -U747202<br>-U1698174                           | -U1657268 | -U590037               |           | -U1801471 |           |
| <i>Campylobacter fetus</i> subsp. <i>fetus</i> 82-40 | NC_008599.1 | -U1516609                                       | +U308451  | +U1234446<br>+U1234860 |           | -C1737280 | -U58288   |
| <i>Campylobacter hominis</i> ATCC BAA-381            | NC_009714.1 | +U381861                                        | -C1700243 |                        |           |           |           |
| <i>Campylobacter jejuni</i> NCTC 11168               | NC_002163.1 | -U1448605                                       | -U1440142 | -U671723               |           | +C731918  | -U852183  |
| <i>Campylobacter lari</i> RM2100                     | NC_012039.1 | +U331379                                        | +U335711  | +U854225               |           | +C745718  | +U1300993 |
| <i>Helicobacter acinonychis</i> str. Sheeba          | NC_008229.1 |                                                 |           |                        |           |           |           |
| <i>Helicobacter bizzozeronii</i> CIII-1              | NC_015674.1 | +U1255321                                       | -U791097  |                        |           |           |           |
| <i>Helicobacter cetorum</i> MIT 00-7128              | NC_017737.1 | +U1409610                                       | -U1260998 |                        |           |           |           |
| <i>Helicobacter cetorum</i> MIT 99-5656              | NC_017735.1 | +U1131295                                       | -U1169426 |                        |           |           |           |
| <i>Helicobacter cinaedi</i> PAGU611                  | NC_017761.1 | +U599656                                        | -U902575  |                        |           |           | -U1129348 |
| <i>Helicobacter felis</i> ATCC 49179                 | NC_014810.2 | +U127793                                        | +U108683  |                        |           |           |           |
| <i>Helicobacter hepaticus</i> ATCC 51449             | NC_004917.1 | -U220081                                        | -U1659856 |                        |           |           | +U1706239 |
| <i>Helicobacter mustelae</i> 12198                   | NC_013949.1 |                                                 | -U959479  |                        |           |           |           |
| <i>Helicobacter pylori</i> 26695                     | NC_000915.1 |                                                 |           |                        |           |           |           |
| <i>Helicobacter pylori</i> B8                        | NC_014256.1 |                                                 |           |                        |           |           |           |
| <i>Helicobacter pylori</i> ELS37                     | NC_017063.1 |                                                 |           |                        |           |           |           |
| <i>Helicobacter pylori</i> G27                       | NC_011333.1 |                                                 |           |                        |           |           |           |
| <i>Helicobacter pylori</i> Gambia94/24               | NC_017371.1 |                                                 |           |                        |           |           |           |
| <i>Helicobacter pylori</i> India7                    | NC_017372.1 |                                                 |           |                        |           |           |           |
| <i>Helicobacter pylori</i> P12                       | NC_011498.1 |                                                 |           |                        |           |           |           |
| <i>Helicobacter pylori</i> PeCan4                    | NC_014555.1 |                                                 |           |                        |           |           |           |
| <i>Helicobacter pylori</i> Shi417                    | NC_017739.1 |                                                 |           |                        |           |           |           |
| <i>Helicobacter pylori</i> SouthAfrica7              | NC_017361.1 |                                                 |           |                        |           |           |           |
| <i>Nautilia profundicola</i> AmH                     | NC_012115.1 | +U1204330                                       | -U1188205 |                        |           |           |           |
| <i>Nitratifactor salsuginis</i> DSM 16511            | NC_014935.1 | +C668728                                        | +U299675  |                        | -U600633  |           |           |
| <i>Nitratiruptor</i> sp. SB155-2                     | NC_009662.1 | +C1457780                                       |           |                        | -C1134061 |           |           |
| <i>Sulfuricurvum kujjense</i> DSM 16994              | NC_014762.1 | +C206464                                        |           |                        | +C1029676 |           |           |
| <i>Sulfurimonas autotrophica</i> DSM 16294           | NC_014506.1 | +C718915                                        | -C230256  |                        | +C2039345 |           |           |
| <i>Sulfurimonas denitrificans</i> DSM 1251           | NC_007575.1 | -U852563                                        | +U861222  |                        |           |           |           |
| <i>Sulfurospirillum barnesii</i> SES-3               | NC_018002.1 | +U835355<br>-U2177018                           | -C2156414 |                        |           | +C1892236 |           |
| <i>Sulfurospirillum deleyianum</i> DSM 6946          | NC_013512.1 | +U807322<br>-U2084530                           | -C2063754 |                        |           |           | +C1204375 |
| <i>Sulfurovum</i> sp. NBC37-1                        | NC_009663.1 | +C1555053                                       | -C1881842 |                        | +C718488  |           |           |
| <i>Wolinella succinogenes</i> DSM 1740               | NC_005090.1 | +U695540                                        | -C962320  |                        |           |           |           |

<sup>a</sup>Absolute position in the genomic sequence of U-encoding codons in the identified selenoproteins and of C-encoding codons in homologous sequences; the + and – symbols are used to indicate the direct and complementary strands, respectively.



**Table S4. Conservation of SelA residues involved in hydrogen-bonded intra-dimer interactions**

| Position <sup>a</sup> | Residue | Sec-decoding Helicobacteriaceae <sup>b</sup> |                    | non-Sec-decoding Helicobacteriaceae <sup>b</sup> |                    |
|-----------------------|---------|----------------------------------------------|--------------------|--------------------------------------------------|--------------------|
|                       |         | Consurf grade                                | dN/dS <sup>c</sup> | Consurf grade                                    | dN/dS <sup>c</sup> |
| 68                    | N       | 6*                                           | 0.05 ± 0.022       | 4*                                               | 0.113 ± 0.24       |
| 70                    | K       | 2*                                           | 0.984 ± 0.293      | 6*                                               | 0.145 ± 0.298      |
| 72                    | V       | 6*                                           | 0.055 ± 0.068      | 7                                                | 0.094 ± 0.202      |
| 79                    | V       | 6                                            | 0.058 ± 0.091      | 9                                                | 0.077 ± 0.158      |
| 83                    | N       | 9                                            | 0.05 ± 0.002       | 1                                                | 2.929 ± 1.92       |
| 84                    | L       | 7                                            | 0.051 ± 0.03       | 5*                                               | 0.09 ± 0.191       |
| 85                    | G       | 9                                            | 0.05 ± 0.001       | 9                                                | 0.138 ± 0.285      |
| 87                    | A       | 8                                            | 0.05 ± 0.005       | 7                                                | 0.169 ± 0.345      |
| 89                    | L       | 4*                                           | 0.053 ± 0.052      | 6*                                               | 0.091 ± 0.194      |
| 101                   | A       | 6*                                           | 0.05 ± 0.016       | 4*                                               | 0.139 ± 0.289      |
| 104                   | Y       | 7                                            | 0.05 ± 0.005       | 3*                                               | 0.14 ± 0.29        |
| 105                   | S       | 3*                                           | 0.735 ± 0.477      | 5*                                               | 0.076 ± 0.155      |
| 106                   | N       | 7                                            | 0.059 ± 0.097      | 1                                                | 1.075 ± 0.489      |
| 108                   | E       | 9                                            | 0.05 ± 0.001       | 9                                                | 0.074 ± 0.151      |
| 111                   | L       | 9                                            | 0.05 ± 0.005       | 8                                                | 0.135 ± 0.281      |
| 119                   | R       | 9                                            | 0.05 ± 0.002       | 9                                                | 0.149 ± 0.306      |
| 122                   | H       | 7                                            | 0.05 ± 0.006       | 5*                                               | 0.125 ± 0.262      |
| 129                   | E       | 6                                            | 0.051 ± 0.035      | 3*                                               | 0.739 ± 0.608      |
| 140                   | N       | 9                                            | 0.05 ± 0.002       | 9                                                | 0.072 ± 0.143      |
| 141                   | N       | 9                                            | 0.05 ± 0.002       | 9                                                | 0.083 ± 0.175      |
| 151                   | N       | 7                                            | 0.089 ± 0.193      | 9                                                | 0.087 ± 0.184      |
| 155                   | E       | 1                                            | 1.128 ± 0.34       | 2*                                               | 0.874 ± 0.843      |
| 285                   | K       | 9                                            | 0.05 ± 0.001       | 9                                                | 0.077 ± 0.159      |
| 291                   | Q       | 9                                            | 0.05 ± 0.001       | 9                                                | 0.145 ± 0.298      |
| 312                   | R       | 9                                            | 0.05 ± 0.002       | 9                                                | 0.079 ± 0.164      |
| 315                   | R       | 9                                            | 0.05 ± 0.001       | 9                                                | 0.097 ± 0.207      |
| 318                   | K       | 9                                            | 0.05 ± 0.001       | 9                                                | 0.076 ± 0.156      |
| 325                   | E       | 1                                            | 1.042 ± 0.212      | 2*                                               | 0.092 ± 0.197      |
| 412                   | R       | 7                                            | 0.05 ± 0.012       | 4*                                               | 0.139 ± 0.289      |

<sup>a</sup>Residue position relative to the AaSelA sequence<sup>b</sup>based on alignments of SelA coding sequences from Helicobacteriaceae with or without the Sec-decoding trait (see Fig. 3)<sup>c</sup>dN/dS variations among sites calculated with PAML

\*Below the confidence cut-off (less than 6 non-gaped homologue sequences)

**Table S5. Conservation of SelA residues involved in hydrogen-bonded dimer-dimer interactions**

| Position <sup>a</sup> | Residue | Sec-decoding Helicobacteriaceae <sup>b</sup> |                    | non-Sec-decoding Helicobacteriaceae <sup>b</sup> |                    |
|-----------------------|---------|----------------------------------------------|--------------------|--------------------------------------------------|--------------------|
|                       |         | Consurf grade                                | dN/dS <sup>c</sup> | Consurf grade                                    | dN/dS <sup>c</sup> |
| 163                   | R       | 8                                            | 0.05 ± 0.008       | 4*                                               | 0.103 ± 0.22       |
| 166                   | L       | 9                                            | 0.05 ± 0.004       | 8                                                | 0.14 ± 0.291       |
| 168                   | E       | 9                                            | 0.05 ± 0.001       | 4*                                               | -                  |
| 174                   | R       | 9                                            | 0.05 ± 0.001       | 3*                                               | 0.484 ± 0.491      |
| 188                   | E       | 7                                            | 0.05 ± 0.021       | 3*                                               | 0.142 ± 0.294      |
| 192                   | T       | 8                                            | 0.05 ± 0.01        | 1                                                | 3.112 ± 1.915      |
| 193                   | N       | 9                                            | 0.05 ± 0.002       | 2*                                               | 1.096 ± 0.544      |
| 196                   | K       | 7                                            | 0.05 ± 0.001       | 3*                                               | 0.103 ± 0.22       |
| 199                   | D       | 9                                            | 0.05 ± 0.001       | 9                                                | 0.07 ± 0.138       |
| 218                   | N       | 9                                            | 0.05 ± 0.002       | 6*                                               | -                  |
| 220                   | Y       | 4*                                           | 0.075 ± 0.156      | 6*                                               | -                  |
| 222                   | E       | 1                                            | 1.133 ± 0.397      | 6*                                               | -                  |
| 224                   | F       | 9                                            | 0.05 ± 0           | 9                                                | 0.092 ± 0.197      |

<sup>a</sup>Residue position relative to the AaSelA sequence<sup>b</sup>based on alignments of SelA coding sequences from Helicobacteriaceae with or without the Sec-decoding trait (see Fig. 3)<sup>c</sup>dN/dS variations among sites calculated with PAML

\*Below the confidence cut-off (less than 6 non-gaped homologue sequences)
